# Supplementary material for: Insights into the Inhibitory Mechanisms of the Covalent Drugs for DNMT3A
Source: Preprints.org preprint supplement (doi:10.20944/preprints202307.0513.v1), 2023-07-07
Supplement: Supplementary file 1 [file supporting information-marked-706.docx]

# *Supporting Information*

**Insights into the inhibition mechanism of the covalent drugs for DNMT3A**

Wei Yang1,2, Jingyuan Zhuang1, Chen Li3, Chen Bai1,4,*, and Gui-Juan Cheng1,4,5,*

1Warshel Institute for Computational Biology, School of Medicine, The Chinese University of Hong Kong, Shenzhen, Shenzhen 518172, China;

2National Clinical Research Center for Infectious Diseases, Shenzhen Third People's Hospital, Shenzhen 518112, China;

3Biomedicine Discovery Institute and Department of Biochemistry and Molecular Biology, Monash University, Melbourne, VIC 3800, Australia;

4School of Life and Health Sciences, School of Medicine, The Chinese University of Hong Kong, Shenzhen, Shenzhen 518172, China;

5The Chinese University of Hong Kong, Shenzhen Futian Biomedical Innovation R&D Center, Shenzhen 518017, China.

***QM calculations of model systems***: Three trimmed systems were modeled to study the preferred attack angle of the methyl group in the nucleophilic addition step. The initial TS structures of dC and AZA-2 systems were established based on the QM/MM optimized TS3 structures of AZA and dC-containing systems. The initial TS structure of the AZA-1 system was built manually. The transition states and IM2 were optimized in water using the B3LYP/6-31G* method. All the QM calculations were performed using the Gaussian 161 software.


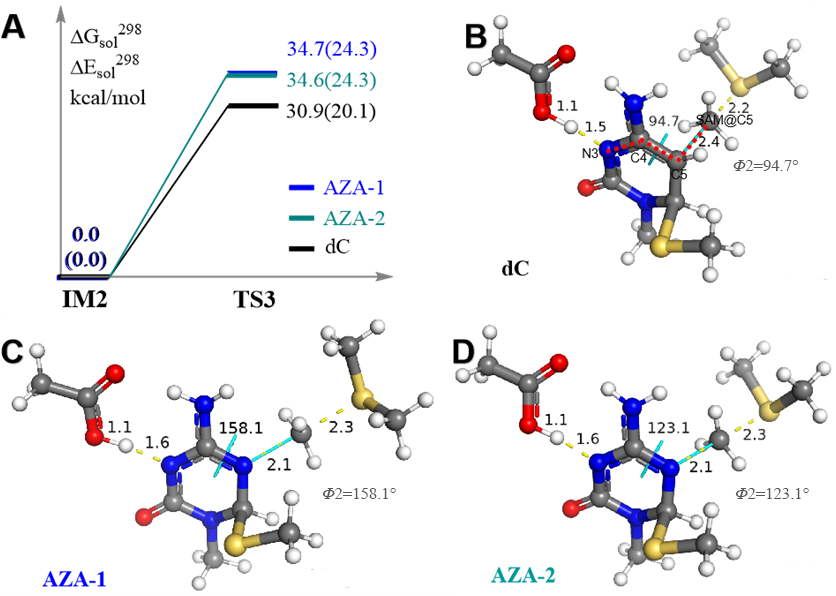


**Figure S1.** (A) The energy profiles and (B-D) optimized TS structures for the model systems. The *Φ*2 (N3-C4-C5-SAM@C5) with cyan dihedral representations were indicated separately under Panels B-D. The key distances were annotated using yellow dashes.

**Table S1**. The detailed key distances and dihedral from reactant state to IM3 in the DNMT3A-DNAdC system (unit=Å, dihedral unit=°).

|  | Distance detail | R | TS1 | IM1 | TS2 | IM2 | TS3 | IM3 |
| --- | --- | --- | --- | --- | --- | --- | --- | --- |
| d1 | Cys710@SG-Cys710@HG | 1.37 | 1.61 | 1.93 | 2.24 | 2.43 | 2.51 | 2.59 |
| d2 | Cys710@HG-WAT@O | 1.77 | 1.26 | 1.05 | 0.99 | 0.97 | 0.97 | 0.97 |
| d3 | WAT@H2-dC304@OP1 | 1.84 | 1.67 | 1.44 | 1.24 | 1.06 | 1.06 | 1.05 |
| d4 | Cys710@SG-dC304@C6 | 3.48 | 3.44 | 3.39 | 2.34 | 2.02 | 1.99 | 1.88 |
| d5 | Glu756@ HE2-Glu756@OE2 | 1.04 | 1.04 | 1.04 | 1.36 | 1.64 | 1.18 | 1.03 |
| d6 | dC304@ N3 -Glu756@HE2 | 1.62 | 1.61 | 1.6 | 1.29 | 1.06 | 1.4 | 1.68 |
| d7 | dC304@C5-SAM@C5 | 3.27 | 3.31 | 3.33 | 3.37 | 3.38 | 2.31 | 1.54 |
| d8 | SAM@C5-SAM@S | 1.80 | 1.81 | 1.81 | 1.8 | 1.81 | 2.28 | 3.38 |
| *Φ*1 | dC304@H6-C6-C5-N1 | 0.92 | 0.92 | 1.35 | -31.27 | -43.06 | -61.17 | -80.72 |
| *Φ*3 | SAM@H7-C5-H8-H9 | -125.9 | -126 | -125.67 | -124.41 | -124.1 | -172.62 | 118.76 |

**Table S2**. The detailed key distances and dihedral from reactant state to IM3 in the DNMT3A-DNAAZA system (unit=Å, dihedral unit=°).

|  | Distance detail | R | TS1 | IM1 | TS2 | IM2 | TS3 | IM3 |
| --- | --- | --- | --- | --- | --- | --- | --- | --- |
| d1 | Cys710@SG-Cys710@HG | 1.37 | 1.55 | 1.96 | 2.11 | 2.43 | 2.47 | 2.58 |
| d2 | Cys710@HG-WAT@O | 1.51 | 1.31 | 1.04 | 1.00 | 0.97 | 0.97 | 0.97 |
| d3 | WAT@H2-**AZA@OP1** | 1.59 | 1..56 | 1.35 | 1.15 | 1.06 | 1.06 | 1.05 |
| d4 | Cys710@SG-**AZA@C6** | 3.34 | 3.33 | 3.17 | 2.46 | 1.95 | 1.96 | 1.90 |
| d5 | Glu756@HE2-Glu756@OE2 | 1.02 | 1.02 | 1.04 | 1.41 | 1.61 | 1.07 | 1.03 |
| d6 | **AZA@N3**-Glu756@HE2 | 1.71 | 1.70 | 1.62 | 1.14 | 1.07 | 1.54 | 1.65 |
| d7 | **AZA @N4**-SAM@C5 | 3.27 | 3.27 | 3.17 | 3.27 | 3.03 | 2.16 | 1.49 |
| d8 | SAM@C5-SAM@S | 1.80 | 1.80 | 1.80 | 1.80 | 1.81 | 2.27 | 3.22 |
| *Φ*1 | **AZA @H6-C6-N4-C5** | 178.56 | -179.43 | -178.71 | 162.37 | 136.08 | 159.01 | 167.90 |
| *Φ*3 | SAM@H7-C5-H8-H9 | -124.51 | 124.53 | -124.61 | -124.75 | -125.15 | -173.15 | 119.02 |

**Table S3.** The detailed key distances and dihedral from reactant state to IM3 in the DNMT3A-DNAZEB system (unit=Å, dihedral unit=°).

|  | Distance detail | R | TS1 | IM1 | TS2 | IM2 | TS3 | IM3 |
| --- | --- | --- | --- | --- | --- | --- | --- | --- |
| d1 | Cys710@SG-Cys710@HG | 1.35 | 1.54 | 1.97 | 2.25 | 2.47 | 2.47 | 2.58 |
| d2 | Cys710@HG-WAT@O | 1.89 | 1.32 | 1.03 | 0.98 | 0.97 | 0.97 | 0.97 |
| d3 | WAT@H2- **ZEB@OP1** | 2.00 | 1.56 | 1.36 | 1.09 | 1.06 | 1.05 | 1.05 |
| d4 | Cys710@SG-**ZEB@C6** | 3.50 | 3.38 | 3.20 | 2.37 | 1.94 | 1.95 | 1.88 |
| d5 | Glu756@HE2-Glu756@OE2 | 1.03 | 1.02 | 1.03 | 1.42 | 1.53 | 1.06 | 1.01 |
| d6 | **ZEB@N3**-Glu756@HE2 | 1.6 | 1.68 | 1.6 | 1.11 | 1.08 | 1.54 | 1.71 |
| d7 | **ZEB@C5-**SAM@C5 | 3.34 | 3.40 | 3.32 | 3.32 | 3.34 | 2.29 | 1.56 |
| d8 | SAM@C5-SAM@S | 1.81 | 1.80 | 1.80 | 1.80 | 1.81 | 2.30 | 3.42 |
| *Φ*1 | **ZEB@H6-C6-C5-N1** | -178.24 | -177.90 | -178.18 | 147.63 | 125.68 | 140.35 | 153.68 |
| *Φ*3 | SAM@H7-C5-H8-H9 | -125.37 | -124.76 | -125.15 | -124.20 | -124.78 | -174.46 | 118.00 |


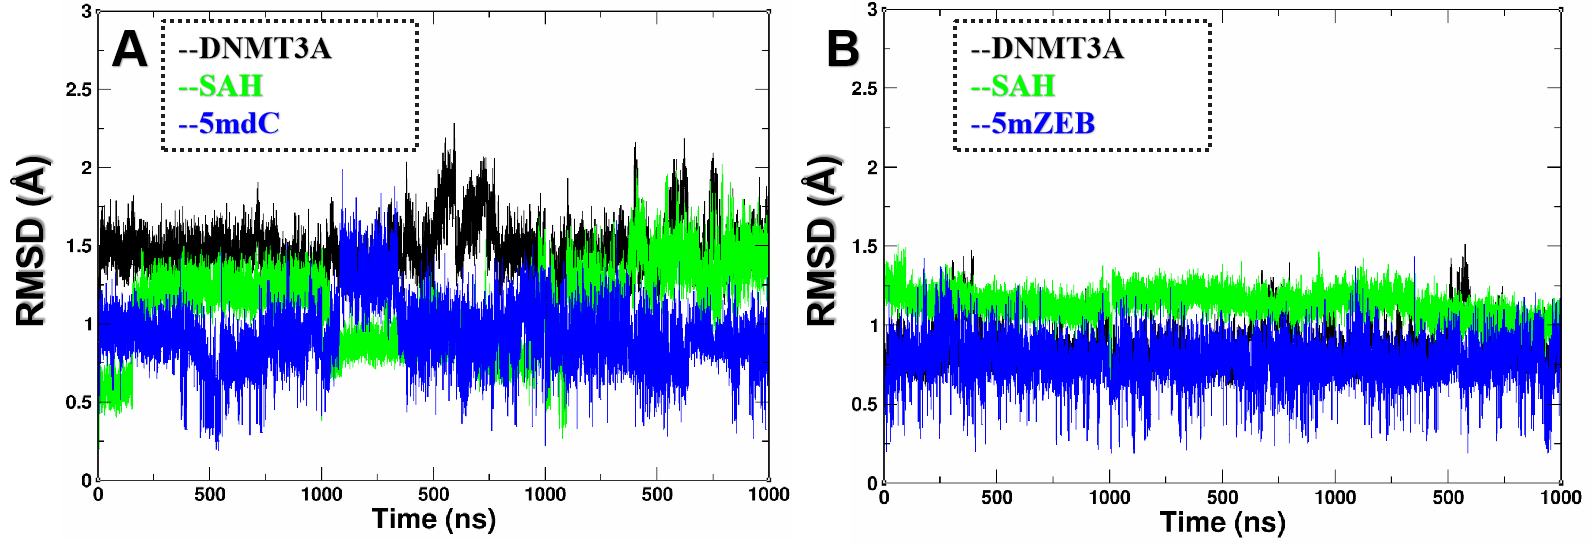


**Figure S2.** The RMSD of the IM3 structures in (A) 5mdC and (B) 5mZEB containing systems.


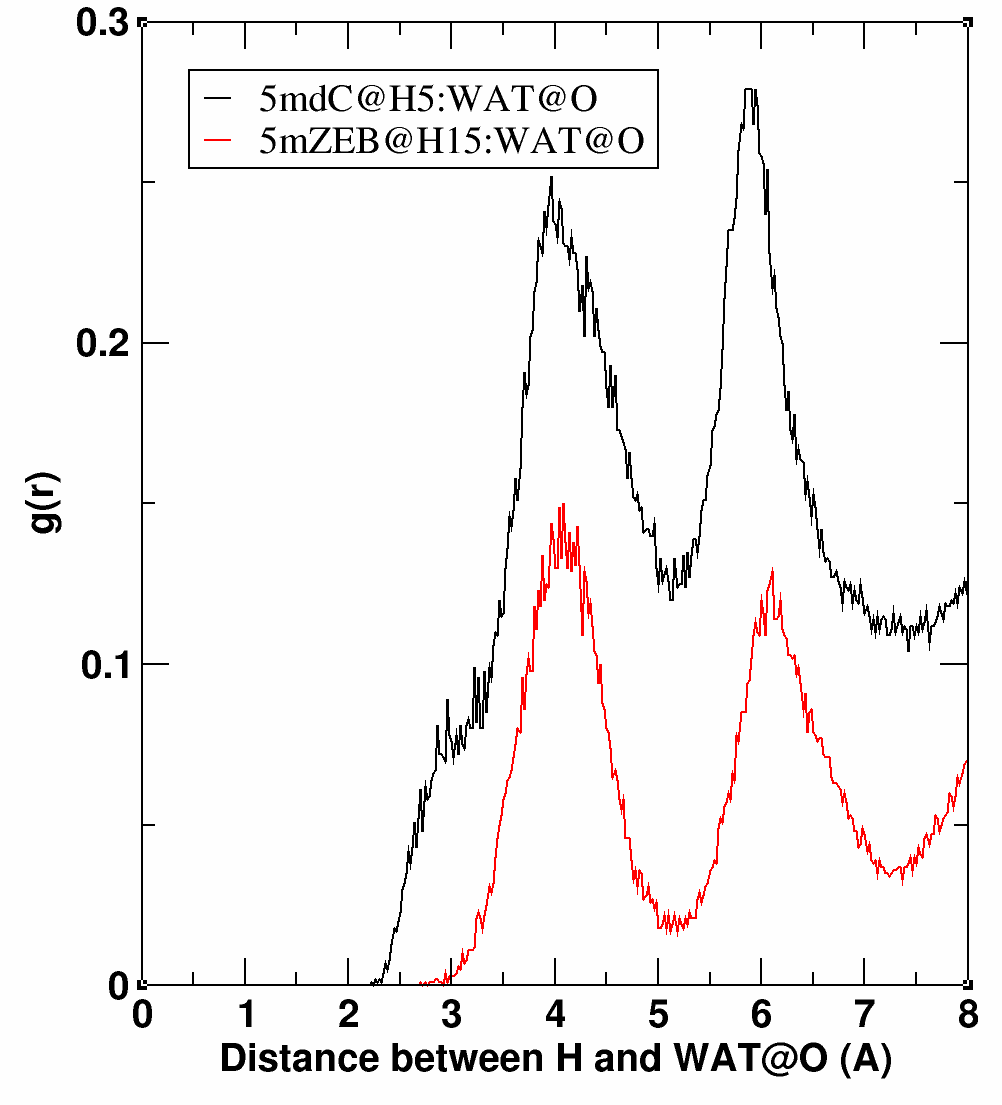


**Figure S3.** The RDF plot for the two systems. The X-axis refers to the distance between the oxygen atom of the water molecule and the H5 atom of (A) 5m-dC and (B) 5m-ZEB, respectively. The Y-axis presents the radial distribution function of the oxygen atoms.


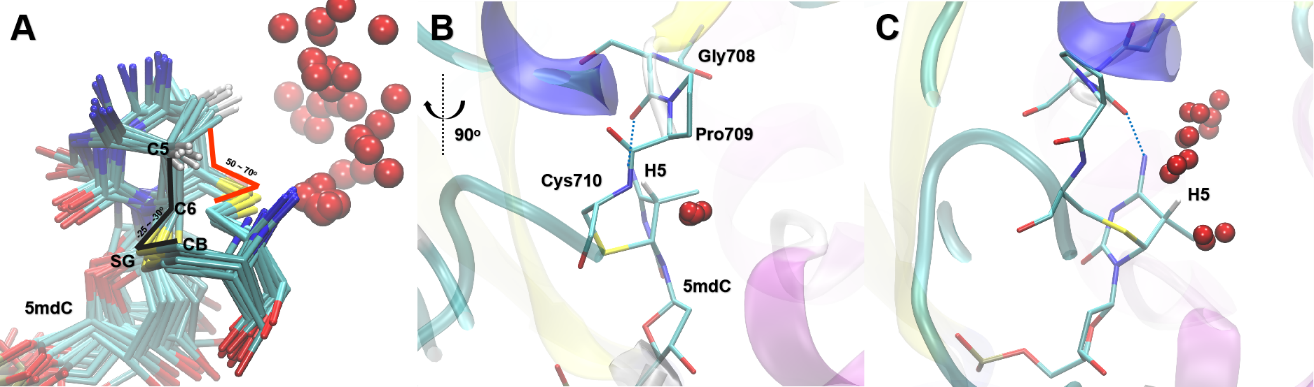


**Figure S4.** The two conformational clusters of 5mdC-Cys710 found in the 5mdC simulation. (A) The detailed structure information shown by the superimposed structures. Two clusters were distinguished by the dihedral *Φ*4 (C5-C6-SG-CB) and shown by black (cluster1) and red (cluster2) lines, respectively. The oxygen atoms of the nearest water molecules to H5 of 5mdC were shown by the VDW representation. The representative structures from cluster1 and cluster2 were shown in panels B and C (rotated 90° from panel B). The cluster oxygen atoms of the nearest water molecules were shown per panel B and C for clarity.

**Supporting Coordinate File (CF):** The coordinate file of all reactants, products, IMs, and TSs calculated in this work were stored in the CF.pse file (compressed as CF.7z), which can be opened by Pymol (https://pymol.org/2/).

Reference:

1. Gaussian 16, Frisch, M. J.; Trucks, G. W.; Schlegel, H. B.; Scuseria, G. E.; Robb, M. A.; Cheeseman, J. R.; Scalmani, G.; Barone, V.; Petersson, G. A.; Nakatsuji, H.; Li, X.; Caricato, M.; Marenich, A. V.; Bloino, J.; Janesko, B. G.; Gomperts, R.; Mennucci, B.; Hratchian, H. P.; Ortiz, J. V.; Izmaylov, A. F.; Sonnenberg, J. L.; Williams-Young, D.; Ding, F.; Lipparini, F.; Egidi, F.; Goings, J.; Peng, B.; Petrone, A.; Henderson, T.; Ranasinghe, D.; Zakrzewski, V. G.; Gao, J.; Rega, N.; Zheng, G.; Liang, W.; Hada, M.; Ehara, M.; Toyota, K.; Fukuda, R.; Hasegawa, J.; Ishida, M.; Nakajima, T.; Honda, Y.; Kitao, O.; Nakai, H.; Vreven, T.; Throssell, K.; Montgomery, J. A. Jr., Peralta, J. E.; Ogliaro, F.; Bearpark, M. J.; Heyd, J. J.; Brothers, E. N.; Kudin, K. N.; Staroverov, V. N.; Keith, T. A.; Kobayashi, R.; Normand, J.; Raghavachari, K.; Rendell, A. P.; Burant, J. C.; Iyengar, S. S.; Tomasi, J.; Cossi, M.; Millam, J. M.; Klene, M.; Adamo, C.; Cammi, R.; Ochterski, J. W.; Martin, R. L.; Morokuma, K.; Farkas, O.; Foresman, J. B.; and Fox, D. J. Gaussian, Inc., Wallingford CT, 2016.
